# Supplementary material for: Chemical Characterization and Evaluation of the Antibacterial Activity of Essential Oils from Fibre-Type Cannabis sativa L. (Hemp)
Source: PubMed Central journal article supplement (PMC6631254; doi:10.3390/molecules24122302), 2019-06-21
Supplement: molecules-24-02302-s001.pdf [file molecules-24-02302-s001.pdf]

# Chemical Characterization and Evaluation of the Antibacterial Activity of Essential Oils from Fibre-Type *Cannabis sativa* L. (Hemp)

Ramona Iseppi <sup>1†</sup>, Virginia Brighenti <sup>1†</sup>, Manuela Licata <sup>2</sup>, Antonella Lambertini <sup>1</sup>, Carla Sabia <sup>1</sup>, Patrizia Messi <sup>1</sup>, Federica Pellati <sup>1\*</sup> and Stefania Benvenuti <sup>1</sup>

<sup>1</sup> Department of Life Sciences, University of Modena and Reggio Emilia, Via G. Campi 103/287, 41125 Modena, Italy; ramona.iseppi@unimore.it (R.I.); virginia.brighenti@unimore.it (V.B.); anto.lambertini@gmail.com (A.L.); carla.sabia@unimore.it (C.S.); patrizia.messi@unimore.it (P.M.); stefania.benvenuti@unimore.it (S.B.)

<sup>2</sup> Department of Biomedical, Metabolical and Neural Sciences, University of Modena and Reggio Emilia, Via del Pozzo 71, 41124, Modena, Italy; manuela.licata@unimore.it (M.L.)

\* Correspondence: federica.pellati@unimore.it; Tel.: +39-059-205-8565

† Both authors contributed equally to this work.

## Supplementary Material

Table S1: Inhibition diameters displayed by hemp EOs and common antibacterial drugs in the agar well disk diffusion assay. Data are expressed in mm.

**Table 1.** Inhibition diameters displayed by hemp EOs and common antibacterial drugs in the agar well disk diffusion assay. Data are expressed in mm.

| Bacterial strain                         | EO1 | EO2 | EO3 | EO4 | EO5 | EO6 | EO7 | EO8 | EO9 | EO10 | EO11 | EO12 | EO13 | EO14 | EO15 | EO16 | EO17 | Ampicillin | Ciprofloxacin |
|------------------------------------------|-----|-----|-----|-----|-----|-----|-----|-----|-----|------|------|------|------|------|------|------|------|------------|---------------|
| <i>Staphylococcus aureus</i> ATCC 6538   | 24  | 0   | 0   | 0   | 0   | 10  | 12  | 12  | 15  | 18   | 24   | 0    | 0    | 10   | 0    | 0    | 0    | -          | 23            |
| <i>Staphylococcus aureus</i> 18As*       | 10  | 0   | 11  | 18  | 15  | 14  | 10  | 11  | 12  | 15   | 10   | 0    | 11   | 0    | 14   | 0    | 0    | -          | 0             |
| <i>Staphylococcus epidermidis</i> 18Bs*  | 21  | 0   | 13  | 20  | 13  | 18  | 13  | 11  | 25  | 22   | 13   | 0    | 16   | 0    | 11   | 0    | 0    | -          | 32            |
| <i>Staphylococcus aureus</i> 386*        | 11  | 13  | 12  | 12  | 13  | 11  | 11  | 15  | 12  | 13   | 10   | 0    | 16   | 19   | 0    | 10   | 13   | -          | 0             |
| <i>Listeria monocytogenes</i> NCTC 10888 | 19  | 16  | 13  | 13  | 23  | 16  | 13  | 11  | 17  | 21   | 13   | 9    | 15   | 11   | 16   | 13   | 13   | 14         | -             |
| <i>Listeria monocytogenes</i> ATCC 13932 | 21  | 13  | 11  | 15  | 13  | 14  | 15  | 15  | 18  | 16   | 20   | 6    | 16   | 11   | 8    | 11   | 11   | 12         | -             |
| <i>Listeria monocytogenes</i> ATCC 5008  | 18  | 0   | 17  | 14  | 11  | 14  | 28  | 24  | 14  | 21   | 24   | 0    | 16   | 11   | 0    | 17   | 15   | 14         | --            |
| <i>Listeria monocytogenes</i> 70*        | 21  | 11  | 0   | 11  | 15  | 15  | 16  | 18  | 13  | 11   | 21   | 6    | 13   | 11   | 9    | 7    | 13   | 0          | -             |
| <i>Listeria monocytogenes</i> 139*       | 14  | 14  | 0   | 13  | 15  | 14  | 13  | 15  | 12  | 13   | 25   | 0    | 11   | 11   | 30   | 0    | 10   | 12         | -             |
| <i>Enterococcus faecalis</i> ATCC 29212  | 28  | 22  | 14  | 18  | 28  | 22  | 20  | 30  | 19  | 26   | 27   | 0    | 18   | 30   | 30   | 16   | 16   | -          | 29            |
| <i>Enterococcus hirae</i> ATCC 10541     | 26  | 14  | 16  | 16  | 0   | 18  | 0   | 13  | 21  | 16   | 15   | 6    | 16   | 16   | 0    | 14   | 14   | -          | 15            |
| <i>Enterococcus faecalis</i> V3*         | 32  | 14  | 16  | 15  | 16  | 24  | 16  | 25  | 14  | 14   | 21   | 0    | 14   | 15   | 11   | 16   | 11   | -          | 40            |
| <i>Enterococcus faecalis</i> V4*         | 26  | 0   | 0   | 0   | 14  | 16  | 18  | 18  | 15  | 18   | 25   | 0    | 12   | 0    | 0    | 0    | 0    | -          | 0             |
| <i>Enterococcus faecium</i> V5*          | 11  | 0   | 21  | 0   | 18  | 24  | 13  | 20  | 24  | 18   | 27   | 0    | 24   | 16   | 15   | 0    | 0    | -          | 19            |
| <i>Enterococcus faecalis</i> V6*         | 26  | 13  | 16  | 11  | 18  | 18  | 21  | 22  | 25  | 16   | 16   | 0    | 14   | 13   | 18   | 14   | 11   | -          | 0             |
| <i>Enterococcus faecium</i> EQ19*        | 28  | 11  | 11  | 13  | 22  | 24  | 10  | 20  | 19  | 18   | 18   | 0    | 9    | 23   | 11   | 11   | 13   | -          | 24            |
| <i>Bacillus subtilis</i> ATCC 6633       | 26  | 16  | 17  | 27  | 21  | 17  | 0   | 18  | 21  | 0    | 19   | 14   | 12   | 32   | 26   | 14   | 17   | 34         | -             |
| <i>Bacillus cereus</i> EB 362            | 29  | 14  | 21  | 12  | 14  | 32  | 0   | 0   | 30  | 0    | 11   | 9    | 17   | 11   | 14   | 14   | 13   | 34         | -             |
| <i>Bacillus</i> 1 <sup>x</sup>           | 30  | 17  | 11  | 14  | 21  | 30  | 18  | 14  | 23  | 21   | 17   | 0    | 15   | 0    | 21   | 11   | 10   | 38         | -             |
| <i>Bacillus</i> 2 <sup>x</sup>           | 35  | 11  | 13  | 14  | 18  | 19  | 18  | 18  | 11  | 17   | 13   | 9    | 16   | 15   | 18   | 13   | 17   | 29         | -             |
| <i>Bacillus</i> 3 <sup>x</sup>           | 12  | 9   | 18  | 23  | 11  | 19  | 14  | 15  | 11  | 11   | 18   | 0    | 14   | 18   | 15   | 15   | 11   | 30         | -             |
| <i>Bacillus</i> 4 <sup>x</sup>           | 29  | 11  | 16  | 16  | 18  | 35  | 0   | 11  | 25  | 14   | 16   | 6    | 11   | 9    | 22   | 14   | 16   | 37         | -             |
| <i>Bacillus</i> 5 <sup>x</sup>           | 27  | 6   | 18  | 10  | 14  | 25  | 16  | 15  | 22  | 11   | 11   | 0    | 18   | 11   | 21   | 11   | 13   | 29         | -             |
| <i>Bacillus</i> 6 <sup>x</sup>           | 30  | 13  | 21  | 18  | 11  | 21  | 11  | 13  | 21  | 18   | 14   | 0    | 15   | 0    | 17   | 16   | 14   | 38         | -             |
| <i>Bacillus</i> 9 <sup>x</sup>           | 11  | 12  | 16  | 23  | 22  | 15  | 24  | 14  | 17  | 0    | 12   | 0    | 13   | 12   | 20   | 11   | 11   | 34         | -             |
| <i>Bacillus</i> 10988 <sup>x</sup>       | 32  | 11  | 11  | 13  | 12  | 23  | 0   | 16  | 20  | 0    | 18   | 9    | 16   | 11   | 18   | 11   | 18   | 30         | -             |
| <i>Bacillus</i> 18100 <sup>x</sup>       | 35  | 12  | 14  | 13  | 0   | 20  | 14  | 10  | 22  | 11   | 13   | 11   | 13   | 13   | 11   | 11   | 0    | 34         | -             |
| <i>Bacillus</i> 18102 <sup>x</sup>       | 32  | 0   | 15  | 9   | 8   | 18  | 11  | 11  | 24  | 9    | 15   | 0    | 16   | 11   | 15   | 9    | 0    | 40         | -             |

\* Bacteria isolated from food samples. <sup>x</sup> Bacteria isolated from food environments.
